# Supplementary figures and images for: Role of IL-33 in inflammation and disease
Source: Springer Nature journal article supplement (doi:10.1186/1476-9255-8-22), 2011-01-01

# Necrosis

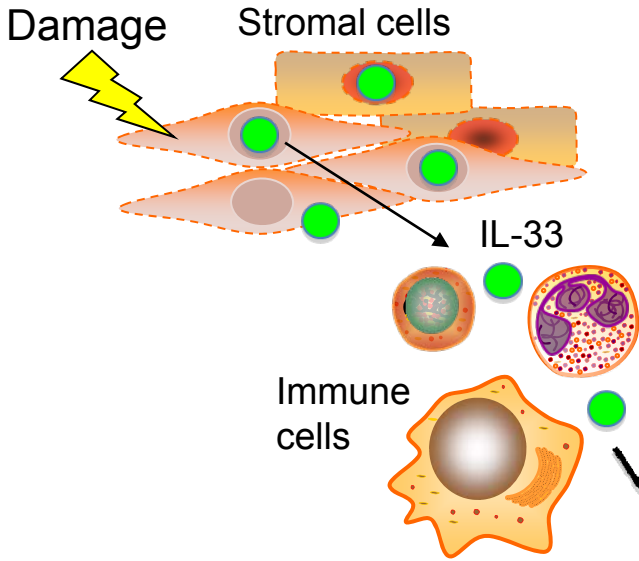

# Apoptosis

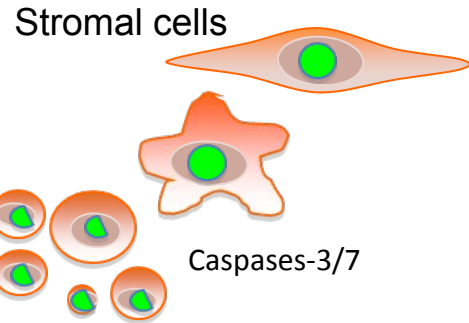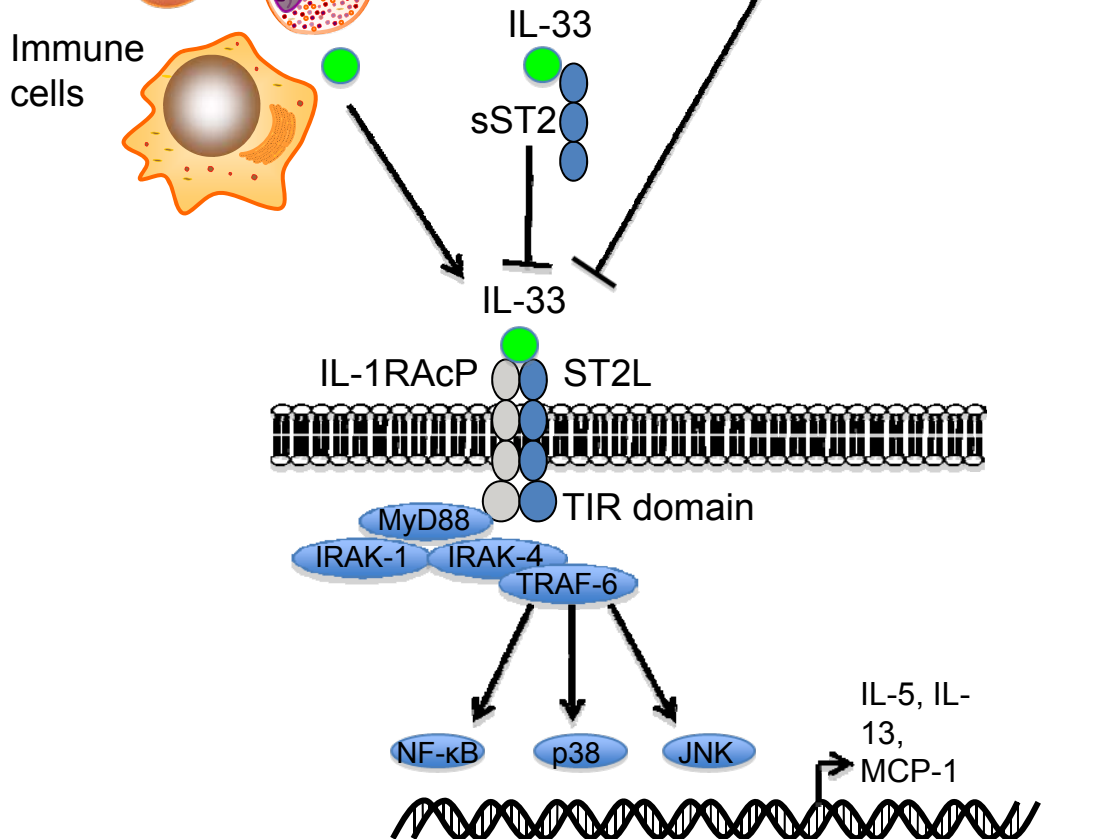

Supplement: 12950_2011_200_MOESM1_ESM.pdf [file 12950_2011_200_MOESM1_ESM.pdf]
